# Supplementary material for: Synthesis of highly sensitive disordered porous SnO2 aerogel composite material by the chemical deposition method: synergistic effect of a layer of CuO thin film
Source: Royal Society of Chemistry journal article supplement (doi:10.1039/c7ra06415b), 2017-01-01
Supplement: c7ra06415b1.pdf [file c7ra06415b1.pdf]

## Supporting information

**Table S1.** Comparison of gas-sensing characteristics and response time of disordered porous SnO<sub>2</sub> matrix material and CuO/SnO<sub>2</sub> aerogel composite material.

| NO <sub>x</sub> conc. (ppm) →                                     | 100          | 50 | 30 | 10   | 5  | 3    | 2  | 1  | 100               | 50 | 30 | 10   | 5  | 3  | 2  | 1  |
|-------------------------------------------------------------------|--------------|----|----|------|----|------|----|----|-------------------|----|----|------|----|----|----|----|
|                                                                   | Response (%) |    |    |      |    |      |    |    | Response Time (s) |    |    |      |    |    |    |    |
| Disordered porous SnO <sub>2</sub> material                       | 54           | 52 | 50 | 44   | 40 | -    | -  | -  | 19.5              | 21 | 25 | 25.5 | 26 | -  | -  | -  |
| Disordered porous CuO/SnO <sub>2</sub> aerogel composite material | 74           | 67 | 66 | 64.8 | 47 | 40.7 | 23 | 15 | 7                 | 8  | 8  | 8    | 16 | 24 | 25 | 26 |

**Table S2.** Comparison of gas-sensing characteristics of disordered porous CuO/SnO<sub>2</sub> sensor towards the different gas.

| Gas Conc.(ppm)→ | 100          | 50 | 30 | 20 | 10   | 5  | 3    | 2  | 1  |
|-----------------|--------------|----|----|----|------|----|------|----|----|
|                 | Response (%) |    |    |    |      |    |      |    |    |
| NO <sub>x</sub> | 74           | 67 | 66 | 65 | 64.8 | 47 | 40.7 | 23 | 15 |
| NH <sub>3</sub> | 51           | 44 | 38 | 29 | 28   | 27 | 26   | 20 | 0  |
| H <sub>2</sub>  | 0            | 0  | 0  | 0  | 0    | 0  | 0    | 0  | 0  |
| O <sub>2</sub>  | 0            | 0  | 0  | 0  | 0    | 0  | 0    | 0  | 0  |
| N <sub>2</sub>  | 0            | 0  | 0  | 0  | 0    | 0  | 0    | 0  | 0  |
